# Supplementary material for: Adenylate Kinase-Catalyzed Reactions of AMP in Pieces: Specificity for Catalysis at the Nucleoside Activator and Dianion Catalytic Sites
Source: PubMed Central journal article supplement — Biochemistry. 2022 Nov 22;61(23):2766–75. doi: 10.1021/acs.biochem.2c00531 (PMC9731266; doi:10.1021/acs.biochem.2c00531), 2022-11-22
Supplement: bi2c00531_si_001.pdf [file bi2c00531_si_001.pdf]

## SUPPORTING INFORMATION

**Adenylate Kinase-Catalyzed Reactions of AMP in Pieces: Specificity for Catalysis at the Nucleoside Activator and Dianion Catalytic Sites**

*Patrick L. Fernandez and John P. Richard<sup>†,\*</sup>*

<sup>†</sup> Department of Chemistry, University at Buffalo, SUNY, Buffalo, New York, 14260–3000, United States

\* Author to whom correspondence should be addressed: EMAIL: jrichard@buffalo.edu

---

Figure S1 shows the Michaelis–Menten plot of  $v_{\text{obs}}/[E]$  against  $[\text{AMP}]$  for rabbit muscle adenylate kinase (RAdK)-catalyzed phosphoryl transfer from 1.0 mM ATP to AMP. Figure S2 shows the Michaelis–Menten plot of  $v_{\text{obs}}/[E]$  against  $[2'\text{-dAMP}]$  for HAdK1-catalyzed phosphoryl transfer from 1 mM ATP (saturating) to 2'-dAMP. These plots give the Michaelis–Menten parameters reported in Table 1.

Figures S3A and S3B show kinetic data for EA-activated RAdK-catalyzed phosphoryl transfer from ATP to  $\text{FPO}_3^{2-}$ . Figures S4A and S4B show kinetic data for adenosine-activated HAdK-catalyzed phosphoryl transfer from ATP to  $\text{HPO}_3^{2-}$ . The kinetic parameter  $(k_{\text{cat}})_{\text{XPi}\cdot\text{EA}}/K_{\text{XPi}}K_{\text{EA}}$  for the EA- and Ado-activated reactions, respectively, reported in Table 2 were determined from the fits of these plots to eq 1 and 2 from the main text. Figure S5 and S6 show, respectively, the effect of increasing  $[2'\text{-dAdo}]$  and  $[3'\text{-dAdo}]$  on  $v_{\text{obs}}/[E]$  for *HsAdK1*-catalyzed reactions of saturating (1 mM) ATP with 23 mM  $[\text{HPO}_3^{2-}]$  at pH 7.5,  $I = 0.150$  (NaCl), and 25 °C.

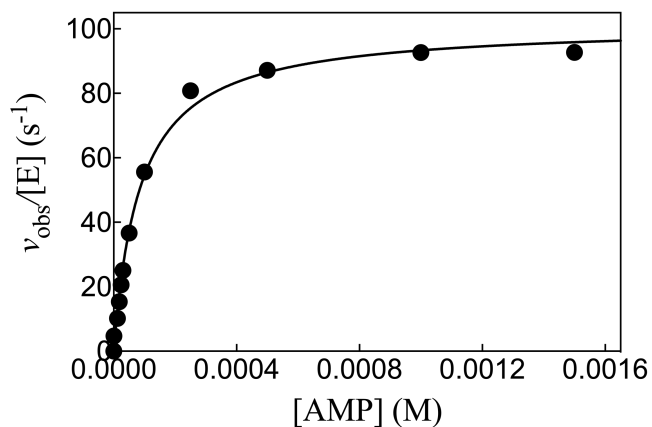

**Figure S1.** The increase in  $v_{\text{obs}}/[E]$  with increasing  $[\text{AMP}]$  for RAdK1-catalyzed phosphoryl transfer from ATP (1 mM) to AMP at pH 7.5,  $I = 0.150$  (NaCl) and 25 °C.

---

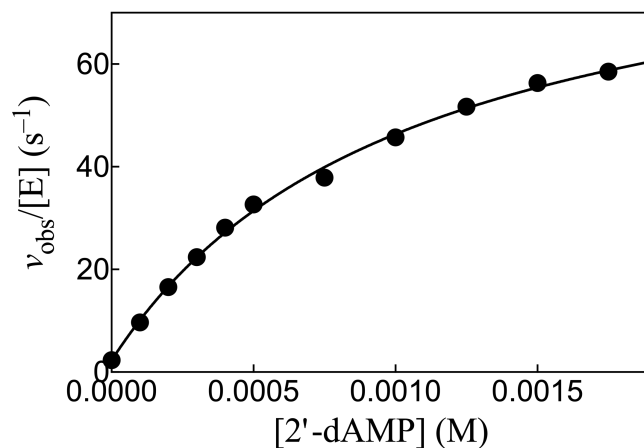

**Figure S2.** The increase in  $v_{\text{obs}}/[E]$  with increasing  $[\text{2'-dAMP}]$  for HAdK1-catalyzed phosphoryl transfer from ATP (1 mM) to 2'-dAMP at pH 7.5,  $I = 0.150$  (NaCl), and 25 °C.

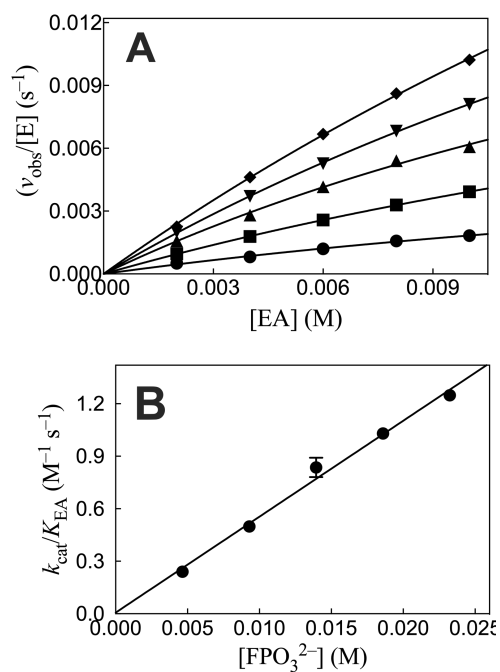

**Figure S3.** (A) The increase in  $v_{\text{obs}}/[E]$  with increasing  $[EA]$  for RAdK1-catalyzed reactions of ATP (1 mM) with  $FPO_3^{2-}$  at pH 7.5,  $I = 0.150$  (NaCl), and 25 °C. Key:  $\blacklozenge$ , 25 mM  $[FPO_3^{2-}]$ ;  $\blacktriangledown$ , 20 mM  $[FPO_3^{2-}]$ ;  $\blacktriangle$ , 15 mM  $[FPO_3^{2-}]$ ;  $\blacksquare$ , 10 mM  $[FPO_3^{2-}]$ ;  $\bullet$ , 5 mM  $[FPO_3^{2-}]$ . (B) The effect of increasing  $[FPO_3^{2-}]$  on the values of  $(k_{\text{cat}}/K_{EA})_{\text{obs}}$  determined for Figure 3A.

---

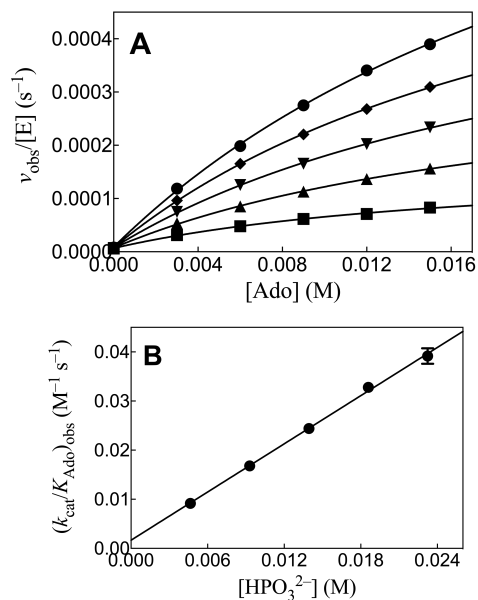

**Figure S4.** (A) The increase in  $v_{\text{obs}}/[E]$  with increasing [Ado] for HAdK1-catalyzed reactions of ATP (1 mM) with phosphite dianion at pH 7.5,  $I = 0.150$  (NaCl), and 25 °C. Key: ●, 23 mM [HPO<sub>3</sub><sup>2-</sup>] (93% dianion); ◆, 19 mM [HPO<sub>3</sub><sup>2-</sup>]; ▼, 14 mM [HPO<sub>3</sub><sup>2-</sup>]; ▲, 9.2 mM [HPO<sub>3</sub><sup>2-</sup>]; ■, 4.6 mM [HPO<sub>3</sub><sup>2-</sup>]. (B) The effect of increasing [HPO<sub>3</sub><sup>2-</sup>] on the values of  $(k_{\text{cat}}/K_{\text{Ado}})_{\text{obs}}$  determined for Figure S4A.

---

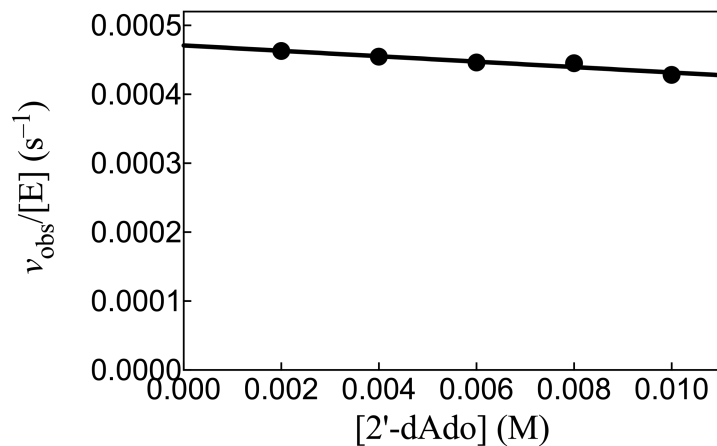

**Figure S5.** The effect of increasing [2'-dAdo] on  $v_{\text{obs}}/[E]$  for HAdK1-catalyzed reactions of ATP (1 mM) with 23 mM  $\text{HPO}_3^{2-}$  at pH 7.5,  $I = 0.150$  (NaCl), and 25 °C.

---

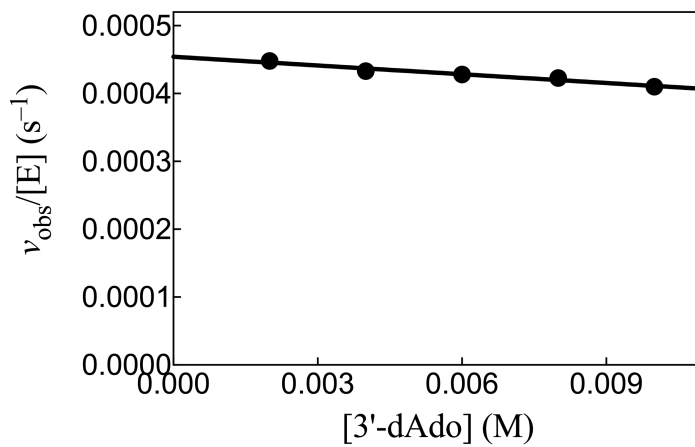

**Figure S6.** The effect of increasing [3'-dAdo] on  $v_{\text{obs}}/[E]$  for HAdK1-catalyzed reactions of ATP (1 mM) with 23 mM  $[\text{HPO}_3^{2-}]$  at pH 7.5,  $I = 0.150$  (NaCl), and 25 °C.
